# Supplementary material for: Study of the BHT Oxidation Mechanism Coupling Theory and Experiment
Source: PubMed Central journal article supplement — ACS Org Inorg Au. 2024 Sep 30;4(6):692–704. doi: 10.1021/acsorginorgau.4c00067 (PMC11621955; doi:10.1021/acsorginorgau.4c00067), 2024-09-30
Supplement: gg4c00067_si_001.pdf [file gg4c00067_si_001.pdf]

# Supplementary Information:

## Study of the BHT Oxidation Mechanism Coupling Theory and Experiment

Edgardo Maximiliano Gavilán-Arriazu,<sup>1\*</sup> Rubén Darío Alaniz,<sup>2</sup> Patcharawat Charoen-amornkitt,<sup>3</sup> Juan Manuel Fernández,<sup>1</sup> Gastón Darío Pierini,<sup>2</sup> and Sergio Antonio Rodríguez<sup>4\*</sup>

<sup>1</sup> Instituto de Bionanotecnología del NOA (INBIONATEC), Universidad Nacional de Santiago del Estero (UNSE), G4206XCP Santiago del Estero, Argentina.

<sup>2</sup> Grupo de Electroanalítica (GEANA), Departamento de Química, Instituto para el Desarrollo Agroindustrial y de la Salud (IDAS), Facultad de Ciencias Exactas, Físico-Químicas y Naturales, Universidad Nacional de Río Cuarto, Río Cuarto, Argentina.

<sup>3</sup> Electrochemical Energy Storage and Conversion Laboratory, Department of Mechanical Engineering, Faculty of Engineering, King Mongkut's University of Technology Thonburi, 126 Pracha Uthit Rd., Bang Mod, Thung Khru, Bangkok 10140, Thailand.

<sup>4</sup> CONICET, Instituto de Ciencias Químicas, Facultad de Agronomía y Agroindustrias (FAyA), Universidad Nacional de Santiago del Estero (UNSE), Av. Belgrano Sur 1912, Santiago del Estero (4200), Argentina. Corresponding author: drsergiorod@gmail.com

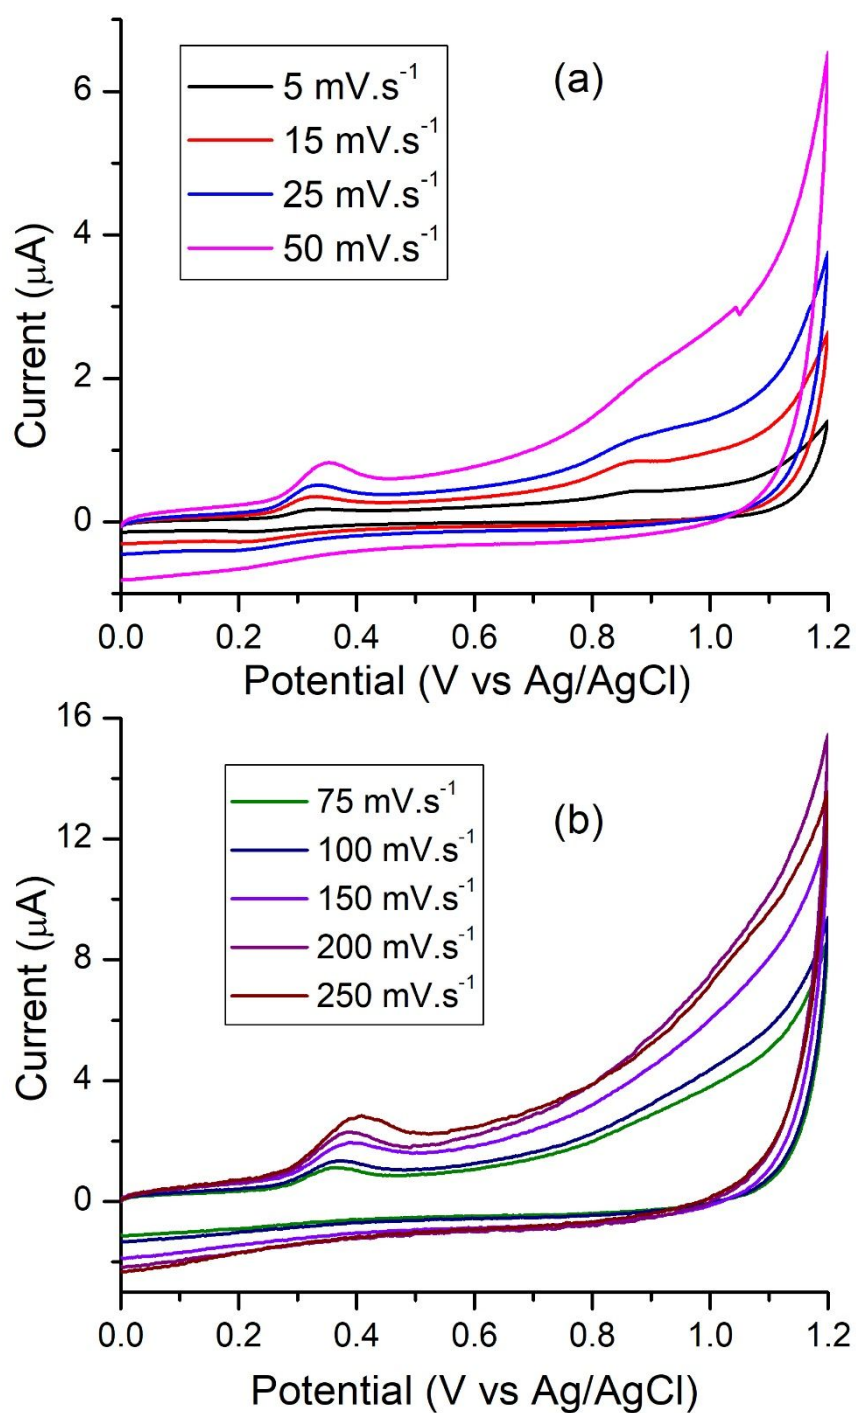

**Figure S1.** Voltammograms for BHT 33  $\mu\text{M}$  in 10.0 ml of solution containing 20% ACN in Britton-Robinson buffer, pH = 5.54, at different scan rates.

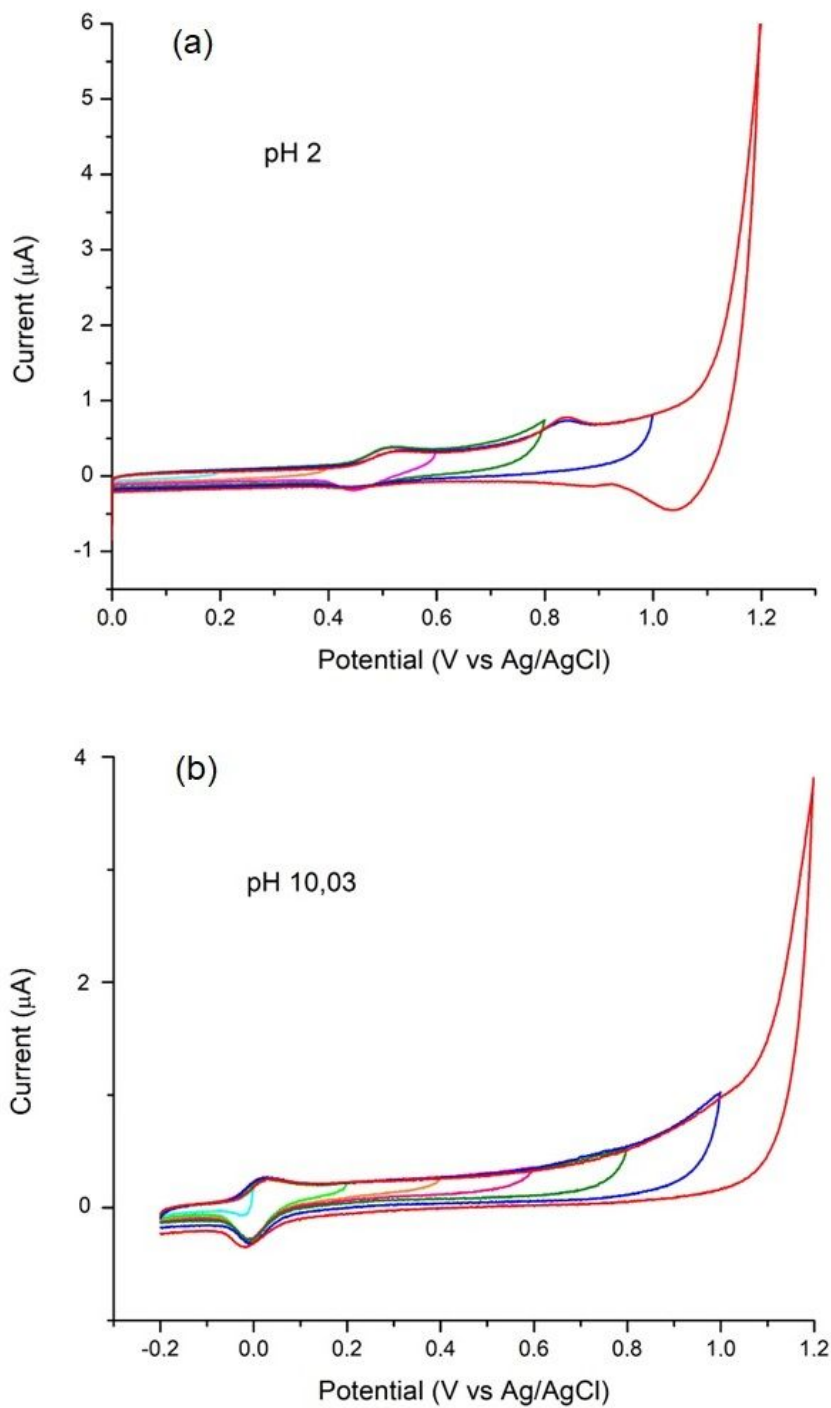

**Figure S2.** Voltammograms for BHT 33  $\mu\text{M}$  in 10.0 ml of solution containing 20% ACN in Britton-Robinson buffer at pH 2 (a) and pH 10 (b) with different potential windows (0 to 0.6 V in pink line; 0 to 0.8 V in green line; 0 to 1.0 V in blue line; 0 to 1.2 V in red line). Scan rate of 10 mV/s.

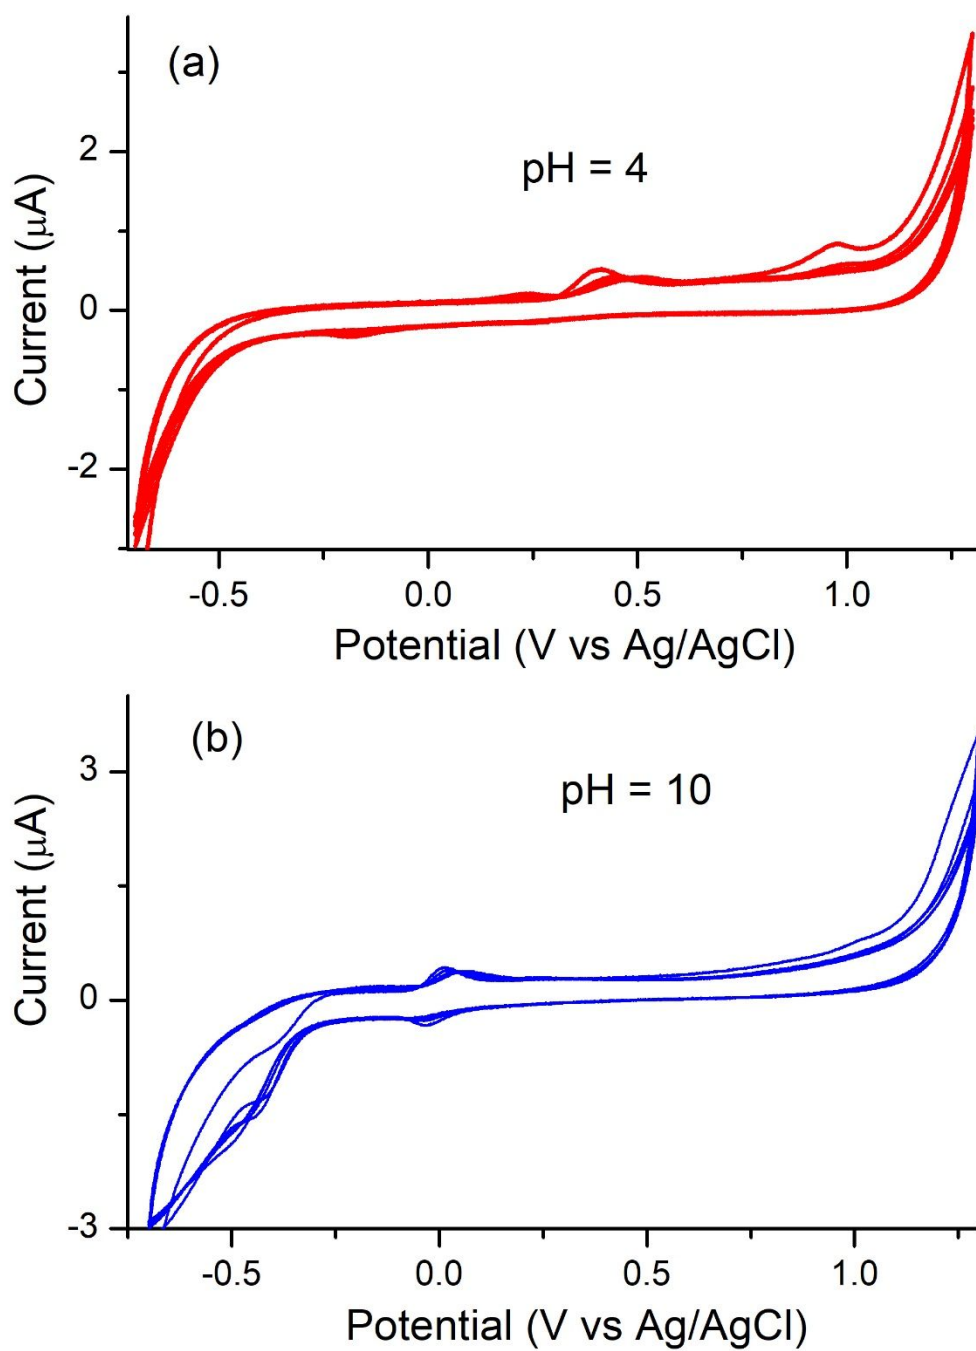

**Figure S3.** Voltammograms for BHT 33  $\mu\text{M}$  in 10.0 ml of solution containing 20% ACN in Britton-Robinson buffer at different pH 4 (a) and 10 (b). It showed five consecutive scans. Scan rate of 10 mV/s.

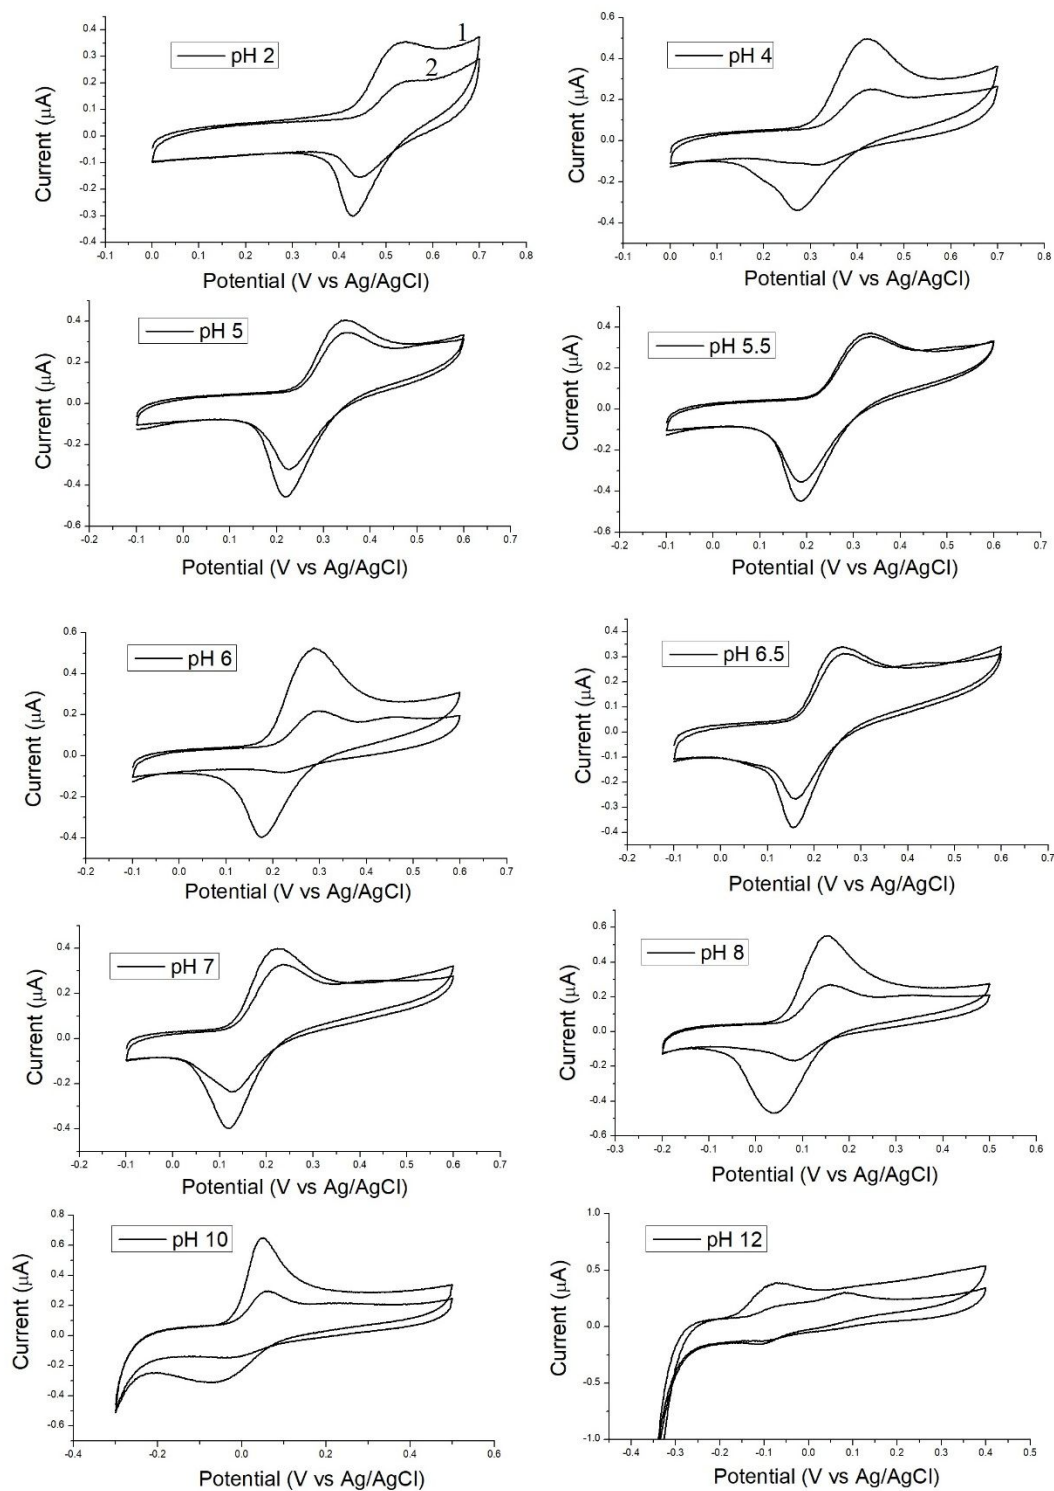

**Figure S4.** Cyclic voltammograms for BHT 33  $\mu\text{M}$  in 10.0 ml of solution containing 20% ACN in Britton-Robinson buffer at different pH values (2-12). It showed two consecutive scans in the potential window assayed, marked with 1 and 2, respectively. Scan rate of 10 mV/s.

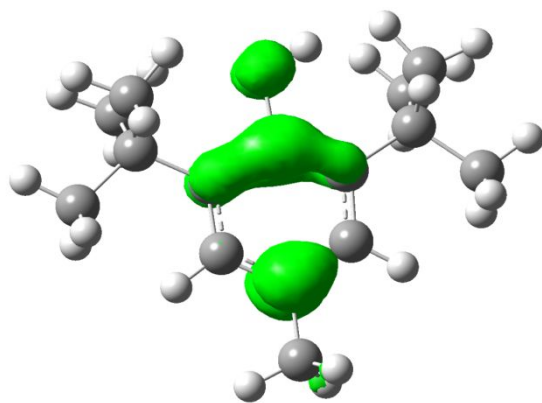

**Figure S5.** Spin density of  $\text{BHT}\cdot^+$ . Isovalue 0.02. Density 0.005.

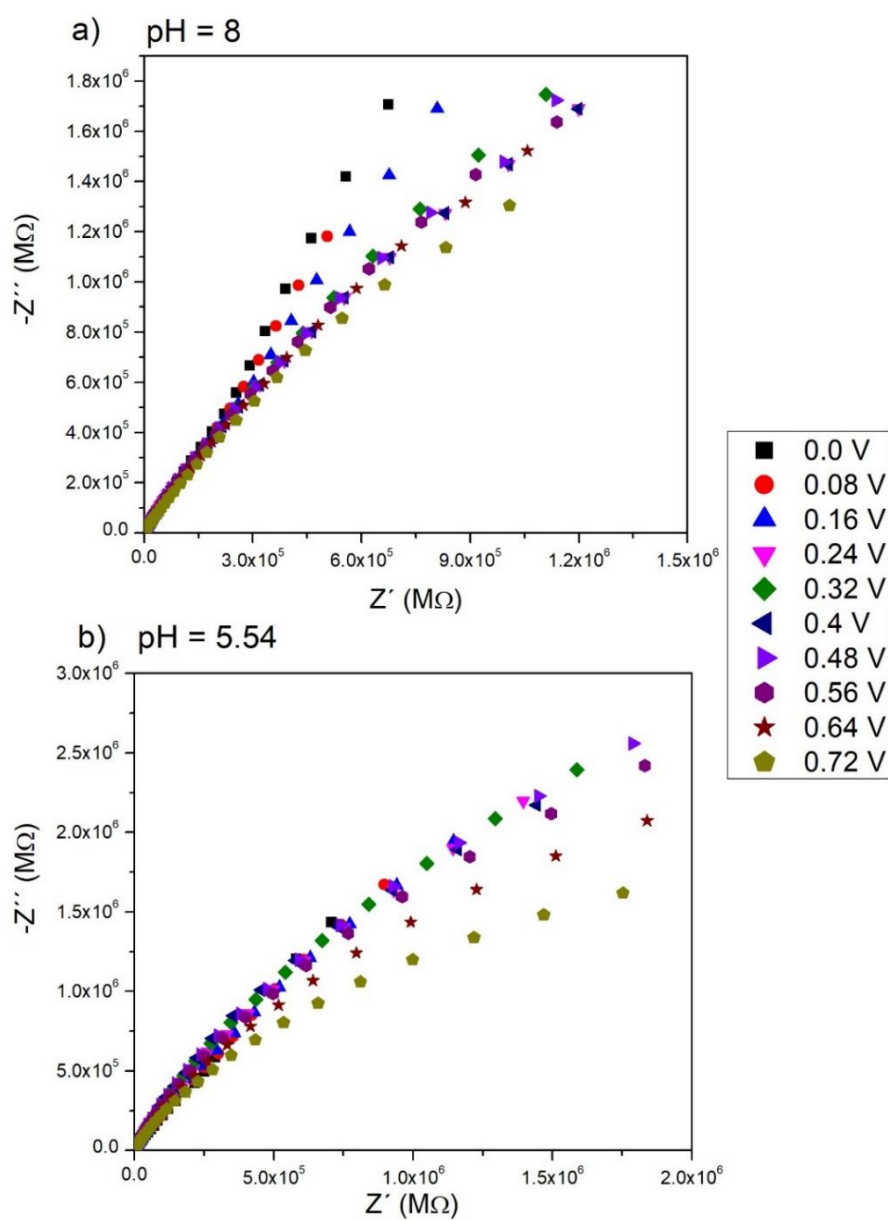

**Figure S6.** Impedance measurements for pH = 8 (a) and 5.54 (b) for different potential values.

**Table S1.** Impedance fitting results for pH 5.54.

| pH   | E/V                                       | Parámetros                                |       | Error% |
|------|-------------------------------------------|-------------------------------------------|-------|--------|
| 5.54 | 0.0                                       | $R_{\Omega}/\Omega$                       | 93.38 | 9.732  |
|      |                                           | $Y_0/\mu\text{F}\cdot\text{s}^{1-\gamma}$ | 3.342 | 4.532  |
|      |                                           | $\gamma$                                  | 0.812 | 1.011  |
|      | 0.08                                      | $R_{\Omega}/\Omega$                       | 96.63 | 9.138  |
|      |                                           | $Y_0/\mu\text{F}\cdot\text{s}^{1-\gamma}$ | 2.839 | 4.374  |
|      |                                           | $\gamma$                                  | 0.828 | 0.956  |
|      | 0.16                                      | $R_{\Omega}/\Omega$                       | 98.40 | 8.426  |
|      |                                           | $Y_0/\mu\text{F}\cdot\text{s}^{1-\gamma}$ | 2.549 | 4.063  |
|      |                                           | $\gamma$                                  | 0.836 | 0.882  |
|      | 0.24                                      | $R_{\Omega}/\Omega$                       | 92.15 | 10.45  |
|      |                                           | $Y_0/\mu\text{F}\cdot\text{s}^{1-\gamma}$ | 2.435 | 4.479  |
|      |                                           | $\gamma$                                  | 0.815 | 0.967  |
|      | 0.32                                      | $R_{\Omega}/\Omega$                       | 81.35 | 16.02  |
|      |                                           | $Y_0/\mu\text{F}\cdot\text{s}^{1-\gamma}$ | 3.018 | 6.035  |
|      |                                           | $\gamma$                                  | 0.777 | 1.315  |
|      | 0.4                                       | $R_{\Omega}/\Omega$                       | 86.80 | 10.47  |
|      |                                           | $Y_0/\mu\text{F}\cdot\text{s}^{1-\gamma}$ | 3.518 | 4.967  |
|      |                                           | $\gamma$                                  | 0.809 | 1.102  |
|      | 0.48                                      | $R_{\Omega}/\Omega$                       | 73.41 | 17.16  |
|      |                                           | $Y_0/\mu\text{F}\cdot\text{s}^{1-\gamma}$ | 2.814 | 5.726  |
|      |                                           | $\gamma$                                  | 0.771 | 1.245  |
| 0.56 | $R_{\Omega}/\Omega$                       | 82.56                                     | 9.933 |        |
|      | $Y_0/\mu\text{F}\cdot\text{s}^{1-\gamma}$ | 4.59                                      | 4.793 |        |
|      | $\gamma$                                  | 0.797                                     | 1.104 |        |
| 0.64 | $R_{\Omega}/\Omega$                       | 86.40                                     | 11.08 |        |
|      | $Y_0/\mu\text{F}\cdot\text{s}^{1-\gamma}$ | 4.969                                     | 5.055 |        |
|      | $\gamma$                                  | 0.772                                     | 1.195 |        |
| 0.72 | $R_{\Omega}/\Omega$                       | 78.05                                     | 11.70 |        |
|      | $Y_0/\mu\text{F}\cdot\text{s}^{1-\gamma}$ | 6.532                                     | 5.485 |        |
|      | $\gamma$                                  | 0.760                                     | 1.323 |        |

Mean values for pH 5.5:  $R_{\Omega} = 86.913$   $Y_0 = 3.6606 \mu\text{F}\cdot\text{s}^{1-\gamma}$   $\gamma = 0.7977$

**Table S2.** Impedance fitting results for pH 8.

| pH   | E/V                 | Parámetros                                |        | Error% |
|------|---------------------|-------------------------------------------|--------|--------|
| 8    | 0.0                 | $R_{\Omega}/\Omega$                       | 64.58  | 10.30  |
|      |                     | $Y_0/\mu\text{F}\cdot\text{s}^{1-\gamma}$ | 2.1250 | 3.176  |
|      |                     | $\gamma$                                  | 0.803  | 0.680  |
|      | 0.08                | $R_{\Omega}/\Omega$                       | 67.86  | 8.379  |
|      |                     | $Y_0/\mu\text{F}\cdot\text{s}^{1-\gamma}$ | 1.878  | 2.741  |
|      |                     | $\gamma$                                  | 0.818  | 0.581  |
| 0.16 | $R_{\Omega}/\Omega$ | 69.67                                     | 6.797  |        |

|      |  |                                           |       |       |
|------|--|-------------------------------------------|-------|-------|
|      |  | $Y_0/\mu\text{F}\cdot\text{s}^{1-\gamma}$ | 1.632 | 2.325 |
|      |  | $\gamma$                                  | 0.834 | 0.487 |
| 0.24 |  | $R_\Omega/\Omega$                         | 74.80 | 4.968 |
|      |  | $Y_0/\mu\text{F}\cdot\text{s}^{1-\gamma}$ | 2.441 | 2.486 |
| 0.32 |  | $\gamma$                                  | 0.875 | 0.530 |
|      |  | $R_\Omega/\Omega$                         | 65.35 | 12.13 |
| 0.4  |  | $Y_0/\mu\text{F}\cdot\text{s}^{1-\gamma}$ | 3.442 | 5.307 |
|      |  | $\gamma$                                  | 0.813 | 1.134 |
| 0.48 |  | $R_\Omega/\Omega$                         | 63.25 | 13.42 |
|      |  | $Y_0/\mu\text{F}\cdot\text{s}^{1-\gamma}$ | 1.711 | 4.241 |
| 0.56 |  | $\gamma$                                  | 0.818 | 0.865 |
|      |  | $R_\Omega/\Omega$                         | 69.60 | 10.81 |
| 0.64 |  | $Y_0/\mu\text{F}\cdot\text{s}^{1-\gamma}$ | 2.499 | 4.660 |
|      |  | $\gamma$                                  | 0.833 | 0.969 |
| 0.72 |  | $R_\Omega/\Omega$                         | 64.14 | 14.40 |
|      |  | $Y_0/\mu\text{F}\cdot\text{s}^{1-\gamma}$ | 2.738 | 5.614 |
| 0.72 |  | $\gamma$                                  | 0.809 | 1.167 |
|      |  | $R_\Omega/\Omega$                         | 63.51 | 9.063 |
| 0.72 |  | $Y_0/\mu\text{F}\cdot\text{s}^{1-\gamma}$ | 6.724 | 3.169 |
|      |  | $\gamma$                                  | 0.720 | 0.857 |
| 0.72 |  | $R_\Omega/\Omega$                         | 55.52 | 12.91 |
|      |  | $Y_0/\mu\text{F}\cdot\text{s}^{1-\gamma}$ | 6.674 | 3.834 |
| 0.72 |  | $\gamma$                                  | 0.713 | 0.982 |

Mean values for pH 8:  $R_\Omega = 65.828$   $Y_0 = 3.1864 \mu\text{F}\cdot\text{s}^{1-\gamma}$   $\gamma = 0.8036$

### Equations for the electrochemical mechanism of BHT

$$\frac{\partial C_{BHT}}{\partial t} = D_{BHT} \frac{\partial^2 C_{BHT}}{\partial x^2} \quad (\text{S1})$$

$$\frac{\partial C_{BHT^*}}{\partial t} = D_{BHT} \frac{\partial^2 C_{BHT^*}}{\partial x^2} - k_{f1}(C_{BHT^*})^2 + k_{b1}C_{dimer} \quad (\text{S2})$$

$$\frac{\partial \Gamma_{BHT}}{\partial t} = v_{ads,BHT} - v_{des,BHT} - k_{ox,1}^{ads} \Gamma_{BHT} + k_{red,1}^{ads} \Gamma_{BHT^*} \quad (\text{S3})$$

$$\frac{\partial \Gamma_{BHT^*}}{\partial t} = v_{ads,BHT^*} - v_{des,BHT^*} + k_{ox,1}^{ads} \Gamma_{BHT} - k_{red,1}^{ads} \Gamma_{BHT^*} - k_{ox,2}^{ads} \Gamma_{BHT^*} + k_{red,2}^{ads} \Gamma_{BHT^+} \quad (\text{S4})$$

$$\frac{\partial \Gamma_{BHT^+}}{\partial t} = v_{ads,BHT^+} - v_{des,BHT^+} + k_{ox,2}^{ads} \Gamma_{BHT^*} - k_{red,2}^{ads} \Gamma_{BHT^+} - k_{f2,ads} \Gamma_{BHT^+} \quad (\text{S5})$$

where

$$k_{ox,i}^{ads} = k_{i,ads}^0 e^{(1-\alpha)(E_{act}-E_i^0)F/RT} \quad (\text{S6})$$

$$k_{red,i}^{ads} = k_{i,ads}^0 e^{-\alpha(E_{act}-E_i^0)F/RT} \quad (\text{S7})$$

according to the Butler-Volmer approach.

Faradaic current:

$$I_f = I_{f1} + I_{f,ads1} + I_{f,ads2} \quad (\text{S8})$$



$$I_{f1} = AFk_1^0 [C_{BHT} e^{(1-\alpha)F(E_{act}-E_1^0)/RT} - C_{BHT^*} e^{-\alpha F(E_{act}-E_1^0)/RT}] \quad (S9)$$

$$I_{f,ads1} = AFk_{1,ads}^0 [\Gamma_{BHT} e^{(1-\alpha)F(E_{act}-E_{1,ads}^0)/RT} - \Gamma_{BHT^*} e^{-\alpha F(E_{act}-E_{1,ads}^0)/RT}] \quad (S10)$$

$$I_{f,ads2} = AFk_{2,ads}^0 [\Gamma_{BHT^*} e^{(1-\alpha)F(E_{act}-E_{2,ads}^0)/RT} - \Gamma_{BHT} e^{-\alpha F(E_{act}-E_{2,ads}^0)/RT}] \quad (S11)$$

with boundary condition at the electrode surface:

$$D_{BHT} \left( \frac{\partial C_{BHT}}{\partial x} \right)_{x=0} = \frac{I_{f1}}{FA} + v_{ads,BHT} - v_{des,BHT} \quad (S12)$$

$$D_{BHT} \left( \frac{\partial C_{BHT^*}}{\partial x} \right)_{x=0} = -\frac{I_{f1}}{FA} + v_{ads,BHT^*} - v_{des,BHT^*} \quad (S13)$$

## Computational information

The main calculation information resulting from the structure optimization using the method DFT B3LYP/6-31+G(d,p)/SMD is summarized above. If more information is needed it can be requested to the corresponding author.

## BHT

Imaginary frequencies: 0

Electronic energy: -661.340495 Hartree

Z-matrix

0 1

|   |             |             |             |
|---|-------------|-------------|-------------|
| C | -0.01023300 | 2.27960100  | -0.01744100 |
| C | -1.20901800 | 1.55879500  | -0.00387100 |
| C | -1.25135800 | 0.15813800  | -0.00423500 |
| C | -0.00684300 | -0.52308500 | -0.01610600 |
| C | 1.23523600  | 0.15812400  | -0.01725600 |
| C | 1.18722200  | 1.56295700  | -0.02585600 |
| H | -2.13582000 | 2.12015800  | 0.00210600  |
| H | 2.11143000  | 2.12753000  | -0.03536500 |
| C | -2.60864700 | -0.58959100 | 0.00392200  |
| C | 2.60408200  | -0.57526000 | 0.00767400  |
| O | -0.07127300 | -1.90786100 | -0.01244800 |
| H | 0.79573900  | -2.28863600 | -0.19851500 |
| C | -0.01647100 | 3.79160700  | 0.00140300  |
| H | -0.75480600 | 4.19860500  | -0.69847100 |
| H | -0.27029600 | 4.17865400  | 0.99670200  |
| H | 0.96451500  | 4.19516300  | -0.26775100 |
| C | 2.79929400  | -1.46199900 | -1.25060100 |
| H | 2.09958400  | -2.30012200 | -1.34015400 |
| H | 2.70303000  | -0.86228300 | -2.16190300 |
| H | 3.80326600  | -1.90004000 | -1.23579400 |
| C | 2.75103800  | -1.41968800 | 1.30051000  |
| H | 3.73393900  | -1.90418900 | 1.31279900  |
| H | 2.68036100  | -0.77650600 | 2.18447900  |
| H | 1.99886600  | -2.20641400 | 1.40540000  |

|   |             |             |             |
|---|-------------|-------------|-------------|
| C | 3.78548100  | 0.42018300  | 0.00666700  |
| H | 3.77325300  | 1.07569500  | 0.88318600  |
| H | 4.72181200  | -0.14669000 | 0.03097100  |
| H | 3.79895700  | 1.04394600  | -0.89302700 |
| C | -2.76455100 | -1.45697400 | -1.26975200 |
| H | -2.71197700 | -0.83362500 | -2.17006800 |
| H | -1.99714200 | -2.22904200 | -1.34315000 |
| H | -3.74374000 | -1.95043300 | -1.26170600 |
| C | -2.73995700 | -1.47266800 | 1.26963900  |
| H | -2.66877300 | -0.86049600 | 2.17634900  |
| H | -3.71954200 | -1.96532900 | 1.27511800  |
| H | -1.97250100 | -2.24658400 | 1.31916400  |
| C | -3.80238500 | 0.38993800  | 0.02189500  |
| H | -4.73216600 | -0.18871900 | 0.02904900  |
| H | -3.80290300 | 1.02636400  | 0.91330000  |
| H | -3.82222300 | 1.03540400  | -0.86268000 |

1 2 1.5 6 1.5 13 1.0  
2 3 1.5 7 1.0  
3 4 1.5 9 1.0  
4 5 1.5 11 1.0  
5 6 1.5 10 1.0  
6 8 1.0  
7  
8  
9 29 1.0 33 1.0 37 1.0  
10 17 1.0 21 1.0 25 1.0  
11 12 1.0  
12  
13 14 1.0 15 1.0 16 1.0  
14  
15  
16  
17 18 1.0 19 1.0 20 1.0  
18  
19  
20  
21 22 1.0 23 1.0 24 1.0  
22  
23  
24  
25 26 1.0 27 1.0 28 1.0  
26  
27  
28  
29 30 1.0 31 1.0 32 1.0  
30  
31

32  
33 34 1.0 35 1.0 36 1.0  
34  
35  
36  
37 38 1.0 39 1.0 40 1.0  
38  
39  
40

**BHT<sup>+</sup>**

Imaginary frequencies: 0

Electronic energy: -661.143179 Hartree

Z-matrix

1 2

|   |             |             |             |
|---|-------------|-------------|-------------|
| C | -0.01226200 | 2.26034600  | -0.00984000 |
| C | -1.23857700 | 1.55735800  | 0.00263500  |
| C | -1.29360400 | 0.17940200  | -0.00158000 |
| C | -0.01313200 | -0.51782300 | -0.01932900 |
| C | 1.27209400  | 0.16384300  | -0.01558200 |
| C | 1.21460600  | 1.53877300  | -0.01703200 |
| H | -2.14867300 | 2.14179400  | 0.01273400  |
| H | 2.12495600  | 2.12341800  | -0.02015200 |
| C | -2.63056900 | -0.58131800 | 0.00638700  |
| C | 2.62366100  | -0.58534800 | 0.00787200  |
| O | -0.10232300 | -1.83357100 | -0.04110500 |
| H | 0.75785600  | -2.28393200 | -0.08160700 |
| C | 0.01857400  | 3.75008800  | -0.01085600 |
| H | -0.98382100 | 4.18118900  | -0.01067200 |
| H | 0.56868300  | 4.11588900  | 0.86651700  |
| H | 0.56905200  | 4.11523200  | -0.88808800 |
| C | 2.77810200  | -1.52149000 | -1.22202000 |
| H | 2.12311400  | -2.39962500 | -1.22339600 |
| H | 2.60163700  | -0.97350800 | -2.15277600 |
| H | 3.80196600  | -1.90727400 | -1.24017800 |
| C | 2.78012400  | -1.38007400 | 1.33292300  |
| H | 3.76698400  | -1.85379100 | 1.34530200  |
| H | 2.71226400  | -0.70682100 | 2.19326700  |
| H | 2.03891600  | -2.17350900 | 1.47121000  |
| C | 3.80233200  | 0.40962000  | -0.05310400 |
| H | 3.81413100  | 1.08764800  | 0.80558600  |
| H | 4.73560000  | -0.16041100 | -0.03681900 |
| H | 3.79037900  | 1.00497200  | -0.97176400 |
| C | -2.77205900 | -1.44252200 | -1.27658700 |
| H | -2.70525800 | -0.81614600 | -2.17276900 |
| H | -2.01573400 | -2.22559000 | -1.34390800 |
| H | -3.75759400 | -1.92017600 | -1.27168500 |

|   |             |             |             |
|---|-------------|-------------|-------------|
| C | -2.73913100 | -1.47365700 | 1.27099300  |
| H | -2.65359700 | -0.86861000 | 2.18015700  |
| H | -3.72275000 | -1.95521400 | 1.27767600  |
| H | -1.97861500 | -2.25493000 | 1.30171300  |
| C | -3.82398500 | 0.39571700  | 0.03320600  |
| H | -4.74917500 | -0.18816300 | 0.04080900  |
| H | -3.82158800 | 1.02571500  | 0.92875800  |
| H | -3.84718000 | 1.04293100  | -0.84959400 |

1 2 1.5 6 1.5 13 1.0  
2 3 2.0 7 1.0  
3 4 1.0 9 1.0  
4 5 1.0 11 1.5  
5 6 2.0 10 1.0  
6 8 1.0  
7  
8  
9 29 1.0 33 1.0 37 1.0  
10 17 1.0 21 1.0 25 1.0  
11 12 1.0  
12  
13 14 1.0 15 1.0 16 1.0  
14  
15  
16  
17 18 1.0 19 1.0 20 1.0  
18  
19  
20  
21 22 1.0 23 1.0 24 1.0  
22  
23  
24  
25 26 1.0 27 1.0 28 1.0  
26  
27  
28  
29 30 1.0 31 1.0 32 1.0  
30  
31  
32  
33 34 1.0 35 1.0 36 1.0  
34  
35  
36  
37 38 1.0 39 1.0 40 1.0  
38  
39

40

**BHT<sup>2+</sup>**

Imaginaries frequencies: 0

Electronic energy: -660.900426 Hartree

Z-matrix

2 1

|   |             |             |             |
|---|-------------|-------------|-------------|
| C | -0.02533200 | 2.24709800  | -0.01768000 |
| C | -1.27807200 | 1.55911800  | 0.01633400  |
| C | -1.34474900 | 0.19931500  | 0.00319800  |
| C | -0.01031900 | -0.51690600 | -0.04439700 |
| C | 1.31392900  | 0.17138800  | -0.01047000 |
| C | 1.23712900  | 1.52583900  | -0.01125000 |
| H | -2.17315600 | 2.16508400  | 0.03849600  |
| H | 2.13037000  | 2.13595800  | -0.00804800 |
| C | -2.65208200 | -0.57397300 | 0.01874000  |
| C | 2.64925000  | -0.58497300 | 0.01957400  |
| O | -0.11440500 | -1.77501100 | -0.12136000 |
| H | 0.72529100  | -2.28326700 | -0.16140300 |
| C | 0.02439600  | 3.70131600  | -0.03917900 |
| H | -0.95255400 | 4.17682500  | -0.10036900 |
| H | 0.56063700  | 4.03030100  | 0.87306500  |
| H | 0.69724200  | 4.03553700  | -0.84677500 |
| C | 2.81143700  | -1.49477300 | -1.23132400 |
| H | 2.15323700  | -2.37046900 | -1.25689000 |
| H | 2.65339600  | -0.92591500 | -2.15182300 |
| H | 3.83359400  | -1.88315000 | -1.23322100 |
| C | 2.77278700  | -1.41234000 | 1.33059100  |
| H | 3.76406600  | -1.87460000 | 1.34495000  |
| H | 2.67965300  | -0.76278100 | 2.20564200  |
| H | 2.03742800  | -2.21735400 | 1.42397500  |
| C | 3.82434900  | 0.41365300  | 0.00104700  |
| H | 3.81740700  | 1.07289500  | 0.87437100  |
| H | 4.75513300  | -0.15870300 | 0.02469500  |
| H | 3.82910100  | 1.02483300  | -0.90698700 |
| C | -2.79885400 | -1.41497000 | -1.28659500 |
| H | -2.74106700 | -0.77117800 | -2.16945100 |
| H | -2.04864600 | -2.20144500 | -1.37073700 |
| H | -3.78788500 | -1.88221800 | -1.26610800 |
| C | -2.71603600 | -1.50555500 | 1.26680400  |
| H | -2.60642200 | -0.92564300 | 2.18822300  |
| H | -3.70199700 | -1.97956200 | 1.27438500  |
| H | -1.95839600 | -2.28940300 | 1.24785300  |
| C | -3.85048200 | 0.39128700  | 0.08913900  |
| H | -4.76706300 | -0.20389900 | 0.10507900  |
| H | -3.83229200 | 1.00281800  | 0.99693300  |
| H | -3.89593800 | 1.05227800  | -0.78216300 |

1 2 1.5 6 1.0 13 1.0  
2 3 2.0 7 1.0  
3 4 1.0 9 1.0  
4 5 1.0 11 2.0  
5 6 2.0 10 1.0  
6 8 1.0  
7  
8  
9 29 1.0 33 1.0 37 1.0  
10 17 1.0 21 1.0 25 1.0  
11 12 1.0  
12  
13 14 1.0 15 1.0 16 1.0  
14  
15  
16  
17 18 1.0 19 1.0 20 1.0  
18  
19  
20  
21 22 1.0 23 1.0 24 1.0  
22  
23  
24  
25 26 1.0 27 1.0 28 1.0  
26  
27  
28  
29 30 1.0 31 1.0 32 1.0  
30  
31  
32  
33 34 1.0 35 1.0 36 1.0  
34  
35  
36  
37 38 1.0 39 1.0 40 1.0  
38  
39  
40

**BHT**

Imaginary frequencies: 0

Electronic energy: -660.711516 Hartree

Z-matrix

0 2

C            0.00002200   2.24998500   -0.01365800

|   |             |             |             |
|---|-------------|-------------|-------------|
| C | -1.22080800 | 1.53602600  | -0.01190300 |
| C | -1.27562000 | 0.15623100  | -0.00190100 |
| C | 0.00110500  | -0.58743600 | 0.00686000  |
| C | 1.27629300  | 0.15751100  | -0.00245900 |
| C | 1.22005300  | 1.53896300  | -0.01311900 |
| H | -2.13433500 | 2.11900500  | -0.01921700 |
| H | 2.13282700  | 2.12274000  | -0.02172800 |
| C | -2.61761200 | -0.59669900 | -0.00165800 |
| C | 2.61939400  | -0.59300000 | -0.00162400 |
| O | 0.00193700  | -1.85241500 | 0.02079200  |
| C | -0.00745400 | 3.75063100  | 0.01378100  |
| H | -0.81664700 | 4.15619900  | -0.60226600 |
| H | -0.17545900 | 4.11109600  | 1.03850700  |
| H | 0.94482700  | 4.16425900  | -0.32898400 |
| C | 2.73923300  | -1.48407000 | -1.26442700 |
| H | 1.96095300  | -2.24768200 | -1.30289600 |
| H | 2.67410200  | -0.87704200 | -2.17482400 |
| H | 3.71423100  | -1.98503100 | -1.26458900 |
| C | 2.74979500  | -1.46155700 | 1.27572200  |
| H | 3.72523000  | -1.96166000 | 1.27709200  |
| H | 2.69114300  | -0.83870800 | 2.17581000  |
| H | 1.97254400  | -2.22500700 | 1.33372000  |
| C | 3.81821500  | 0.37855200  | -0.01507700 |
| H | 3.83460800  | 1.02648500  | 0.86789000  |
| H | 4.74467300  | -0.20499000 | -0.01456700 |
| H | 3.82644400  | 1.01206000  | -0.90857600 |
| C | -2.73560400 | -1.48727200 | -1.26491100 |
| H | -2.67108500 | -0.87966900 | -2.17498100 |
| H | -1.95611400 | -2.24965700 | -1.30359000 |
| H | -3.70975200 | -1.98989900 | -1.26582800 |
| C | -2.74720700 | -1.46596700 | 1.27517300  |
| H | -2.69034300 | -0.84336300 | 2.17555400  |
| H | -3.72162300 | -1.96807100 | 1.27581900  |
| H | -1.96853200 | -2.22796000 | 1.33347000  |
| C | -3.81778000 | 0.37312600  | -0.01519900 |
| H | -4.74348500 | -0.21162200 | -0.01526800 |
| H | -3.83536700 | 1.02073800  | 0.86799200  |
| H | -3.82648400 | 1.00696500  | -0.90847400 |

1 2 1.5 6 1.5 12 1.0

2 3 2.0 7 1.0

3 4 1.0 9 1.0

4 5 1.0 11 2.0

5 6 2.0 10 1.0

6 8 1.0

7

8

9 28 1.0 32 1.0 36 1.0

10 16 1.0 20 1.0 24 1.0  
11  
12 13 1.0 14 1.0 15 1.0  
13  
14  
15  
16 17 1.0 18 1.0 19 1.0  
17  
18  
19  
20 21 1.0 22 1.0 23 1.0  
21  
22  
23  
24 25 1.0 26 1.0 27 1.0  
25  
26  
27  
28 29 1.0 30 1.0 31 1.0  
29  
30  
31  
32 33 1.0 34 1.0 35 1.0  
33  
34  
35  
36 37 1.0 38 1.0 39 1.0  
37  
38  
39

### **BHT<sup>+</sup>**

Imaginaries frequencies: 0

Electronic energy: -660.514451 Hartree

Z-matrix

1 1

|   |             |             |             |
|---|-------------|-------------|-------------|
| C | 0.00004500  | 2.22885800  | -0.00907600 |
| C | -1.24998700 | 1.53525200  | -0.01509300 |
| C | -1.32059000 | 0.17444600  | 0.00013000  |
| C | 0.00038000  | -0.58380200 | 0.04819900  |
| C | 1.32136000  | 0.17550300  | 0.00038300  |
| C | 1.25010100  | 1.53668100  | -0.01446200 |
| H | -2.14527900 | 2.14316600  | -0.03554800 |
| H | 2.14502700  | 2.14502300  | -0.03481700 |
| C | -2.63485600 | -0.58984200 | -0.01809700 |



|   |             |             |             |
|---|-------------|-------------|-------------|
| C | 2.63585500  | -0.58775100 | -0.01814700 |
| O | 0.00112500  | -1.80076400 | 0.14023700  |
| C | -0.00356800 | 3.70329000  | 0.02958000  |
| H | -0.89046100 | 4.12408100  | -0.45087400 |
| H | -0.05817100 | 3.99254400  | 1.09507300  |
| H | 0.91697800  | 4.13234000  | -0.37140300 |
| C | 2.68281900  | -1.52570800 | -1.25713500 |
| H | 1.90421700  | -2.28890500 | -1.22744100 |
| H | 2.57863700  | -0.95144200 | -2.18374500 |
| H | 3.65733700  | -2.02430500 | -1.27447200 |
| C | 2.78181100  | -1.42146800 | 1.28669500  |
| H | 3.75810900  | -1.91669000 | 1.26865400  |
| H | 2.74567600  | -0.77292100 | 2.16821500  |
| H | 2.00795200  | -2.18405400 | 1.37942000  |
| C | 3.84011500  | 0.36979600  | -0.10204700 |
| H | 3.89476700  | 1.03689400  | 0.76437200  |
| H | 4.75713600  | -0.22612000 | -0.12180700 |
| H | 3.81751100  | 0.97860600  | -1.01190300 |
| C | -2.68149300 | -1.52784500 | -1.25692100 |
| H | -2.57778400 | -0.95359500 | -2.18360900 |
| H | -1.90236700 | -2.29054400 | -1.22736800 |
| H | -3.65562200 | -2.02722800 | -1.27425200 |
| C | -2.78039900 | -1.42334200 | 1.28676400  |
| H | -2.74479100 | -0.77461200 | 2.16818900  |
| H | -3.75626300 | -1.91944700 | 1.26894700  |
| H | -2.00596000 | -2.18533600 | 1.37980100  |
| C | -3.83953300 | 0.36717500  | -0.10207800 |
| H | -4.75635500 | -0.22906900 | -0.12168200 |
| H | -3.89440400 | 1.03441800  | 0.76422500  |
| H | -3.81724100 | 0.97586400  | -1.01203100 |

1 2 1.5 6 1.5 12 1.0

2 3 2.0 7 1.0

3 4 1.0 9 1.0

4 5 1.0 11 2.0

5 6 2.0 10 1.0

6 8 1.0

7

8

9 28 1.0 32 1.0 36 1.0

10 16 1.0 20 1.0 24 1.0

11

12 13 1.0 14 1.0 15 1.0

13

14

15

16 17 1.0 18 1.0 19 1.0

17

18  
19  
20 21 1.0 22 1.0 23 1.0  
21  
22  
23  
24 25 1.0 26 1.0 27 1.0  
25  
26  
27  
28 29 1.0 30 1.0 31 1.0  
29  
30  
31  
32 33 1.0 34 1.0 35 1.0  
33  
34  
35  
36 37 1.0 38 1.0 39 1.0  
37  
38  
39

## BHTQM

Imaginaries frequencies: 0

Electronic energy: -660.103357 Hartree

Z-matrix

0 1

|   |             |             |             |
|---|-------------|-------------|-------------|
| C | 0.00000000  | 2.31328400  | -0.00000100 |
| C | 1.24518400  | 1.56719300  | -0.00000200 |
| C | 1.29176300  | 0.20995300  | 0.00000200  |
| C | 0.00000000  | -0.54072300 | 0.00002800  |
| C | -1.29176300 | 0.20995300  | 0.00000000  |
| C | -1.24518400 | 1.56719300  | -0.00000200 |
| H | 2.15427400  | 2.15778400  | -0.00000800 |
| H | -2.15427400 | 2.15778300  | -0.00000800 |
| C | 2.62757500  | -0.55932600 | 0.00000800  |
| C | -2.62757500 | -0.55932600 | -0.00000900 |
| O | 0.00000100  | -1.78804700 | -0.00001300 |
| C | 0.00000000  | 3.67039400  | -0.00000300 |
| H | 0.92907000  | 4.23325700  | -0.00000400 |
| H | -0.92907000 | 4.23325600  | -0.00000300 |
| C | -2.74600200 | -1.43866500 | 1.26980400  |
| H | -1.96087800 | -2.19449400 | 1.32276700  |
| H | -2.69328200 | -0.82182700 | 2.17450200  |
| H | -3.71506900 | -1.95117300 | 1.26997300  |
| C | -2.74601300 | -1.43861900 | -1.26985400 |

|   |             |             |             |
|---|-------------|-------------|-------------|
| H | -3.71507800 | -1.95113200 | -1.27002900 |
| H | -2.69330900 | -0.82174700 | -2.17452900 |
| H | -1.96088600 | -2.19444100 | -1.32285700 |
| C | -3.83315700 | 0.40342000  | 0.00001200  |
| H | -3.84922000 | 1.04444800  | -0.88822400 |
| H | -4.75624100 | -0.18550800 | 0.00001000  |
| H | -3.84920900 | 1.04442300  | 0.88826700  |
| C | 2.74598500  | -1.43865800 | 1.26982800  |
| H | 2.69327000  | -0.82181400 | 2.17452100  |
| H | 1.96084900  | -2.19447500 | 1.32279400  |
| H | 3.71504400  | -1.95118000 | 1.27000300  |
| C | 2.74602900  | -1.43862600 | -1.26983000 |
| H | 2.69332000  | -0.82176100 | -2.17451000 |
| H | 3.71510000  | -1.95112700 | -1.26999800 |
| H | 1.96091200  | -2.19445800 | -1.32283000 |
| C | 3.83315700  | 0.40342000  | 0.00004000  |
| H | 4.75624200  | -0.18550900 | 0.00005000  |
| H | 3.84923100  | 1.04444500  | -0.88819800 |
| H | 3.84920000  | 1.04442500  | 0.88829300  |

1 2 1.0 6 1.0 12 2.0  
2 3 2.0 7 1.0  
3 4 1.0 9 1.0  
4 5 1.0 11 2.0  
5 6 2.0 10 1.0  
6 8 1.0  
7  
8  
9 27 1.0 31 1.0 35 1.0  
10 15 1.0 19 1.0 23 1.0  
11  
12 13 1.0 14 1.0  
13  
14  
15 16 1.0 17 1.0 18 1.0  
16  
17  
18  
19 20 1.0 21 1.0 22 1.0  
20  
21  
22  
23 24 1.0 25 1.0 26 1.0  
24  
25  
26  
27 28 1.0 29 1.0 30 1.0  
28

29

30

31 32 1.0 33 1.0 34 1.0

32

33

34

35 36 1.0 37 1.0 38 1.0

36

37

38
